# Supplementary figures and images for: Prevalent and dynamic binding of the cell cycle checkpoint kinase Rad53 to gene promoters
Source: eLife journal article supplement (doi:10.7554/elife.84320), 2022-12-15

Figure 2 – figure supplement 3

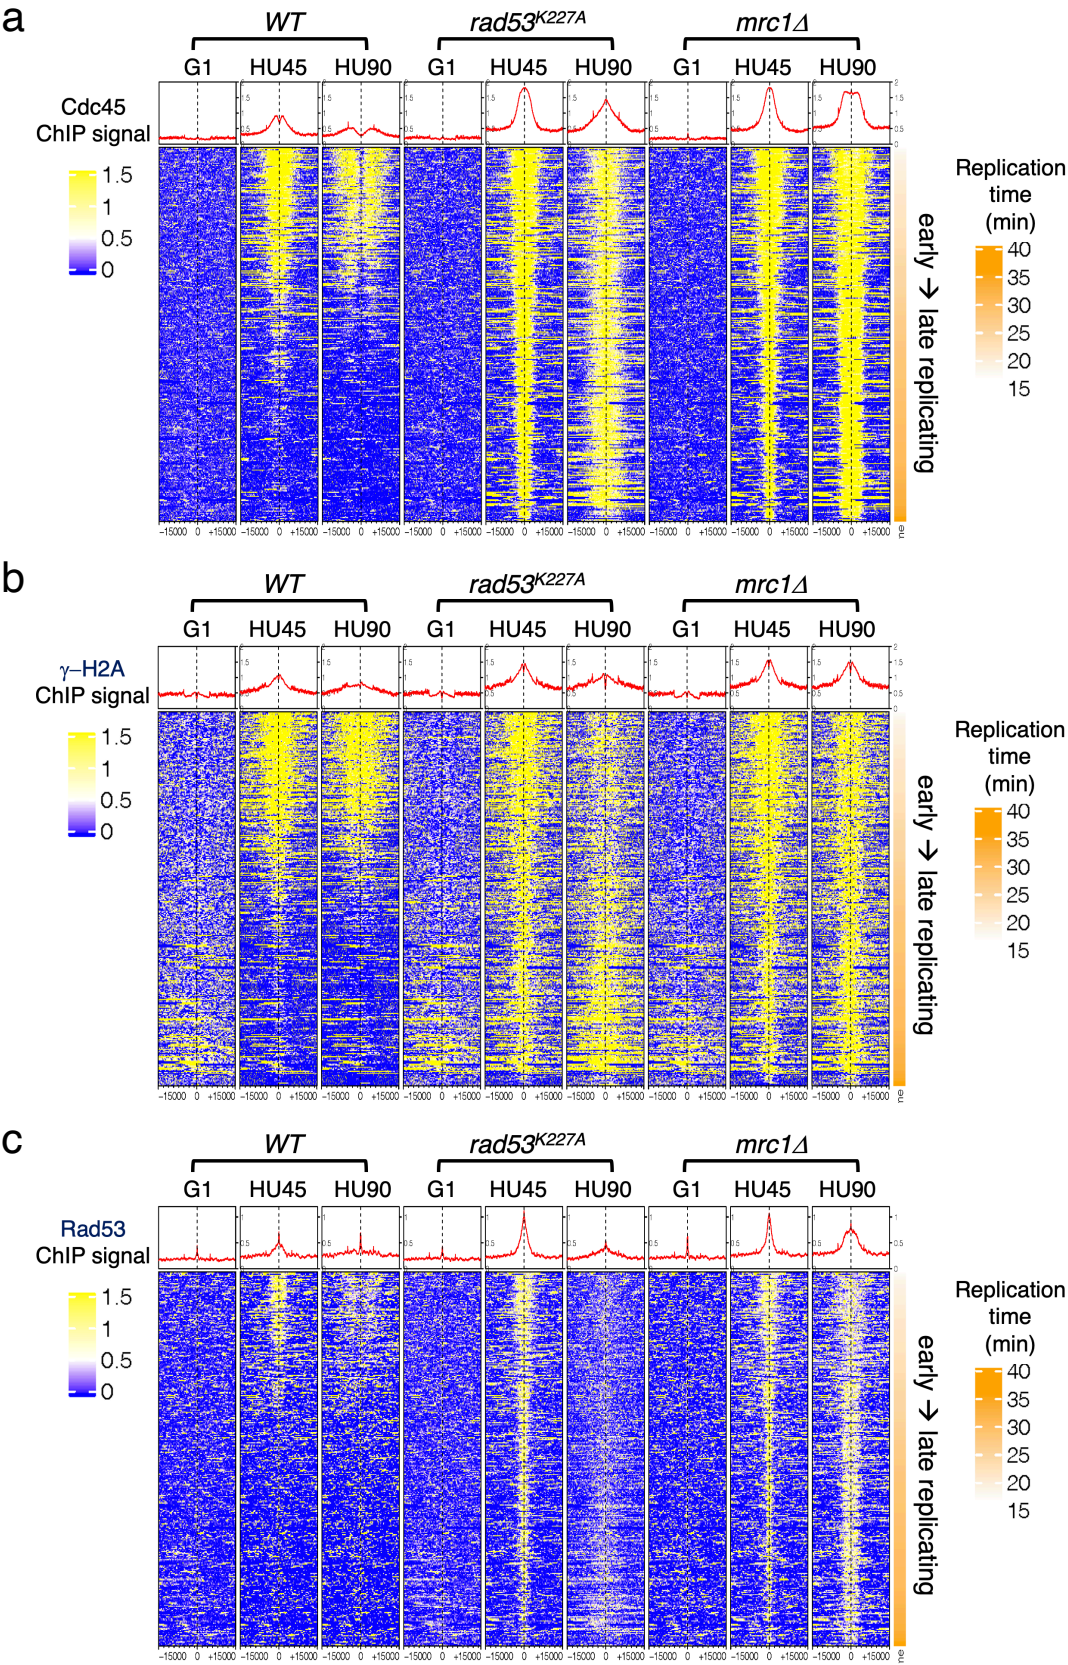

Supplement: supp [file elife-84320-supp-v1.zip]

Figure 6 – figure supplement 1

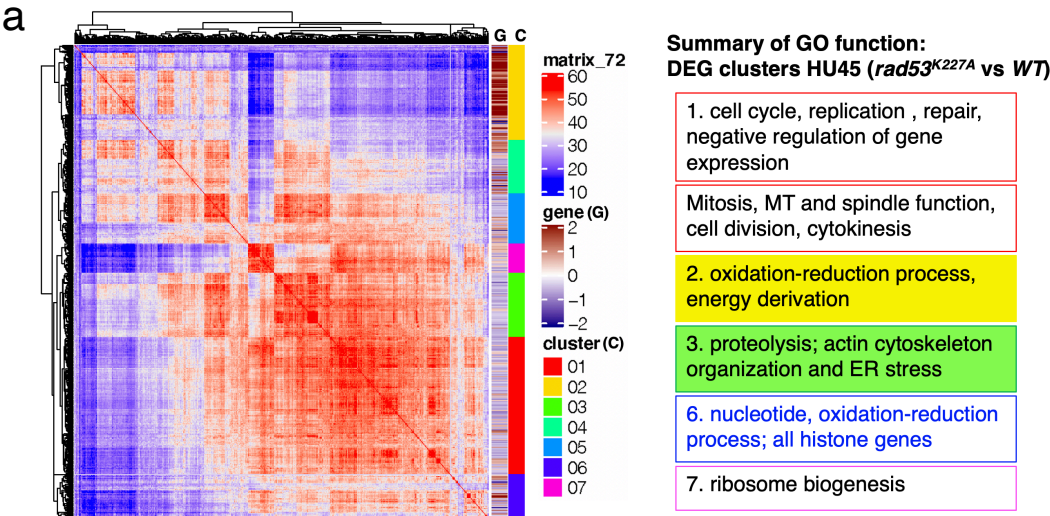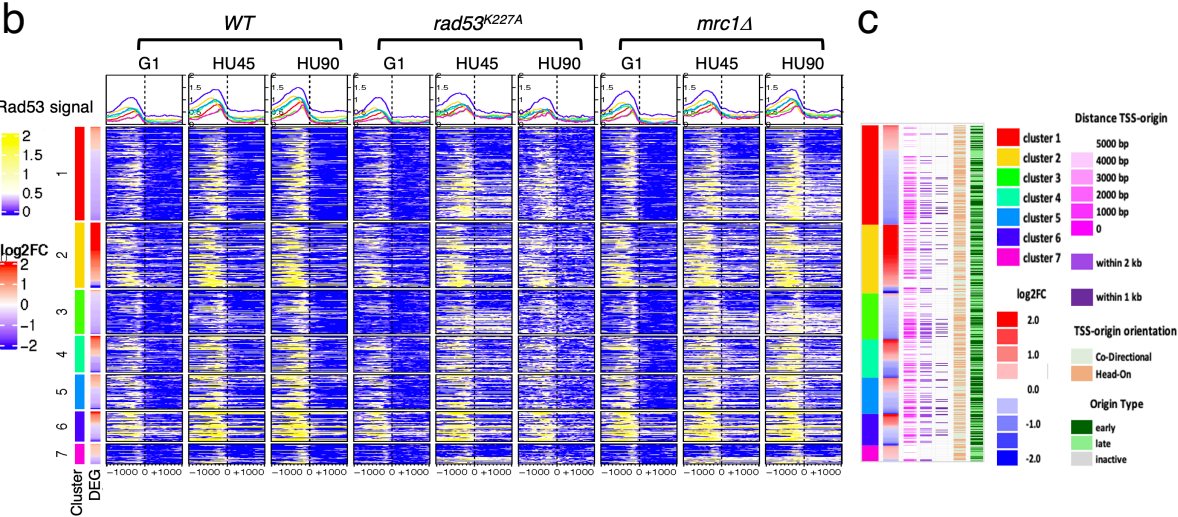

Supplement: supp [file elife-84320-supp-v1.zip]

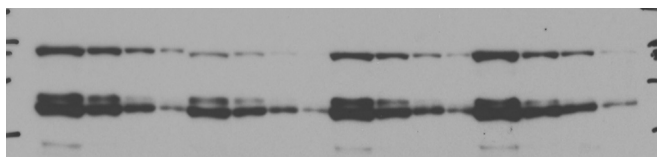

Supplement: supp [file elife-84320-supp-v1.zip]

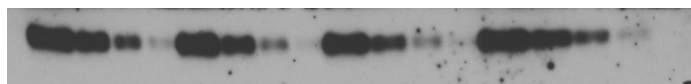

Supplement: supp [file elife-84320-supp-v1.zip]

Source Figure 2 – figure supplement 1a

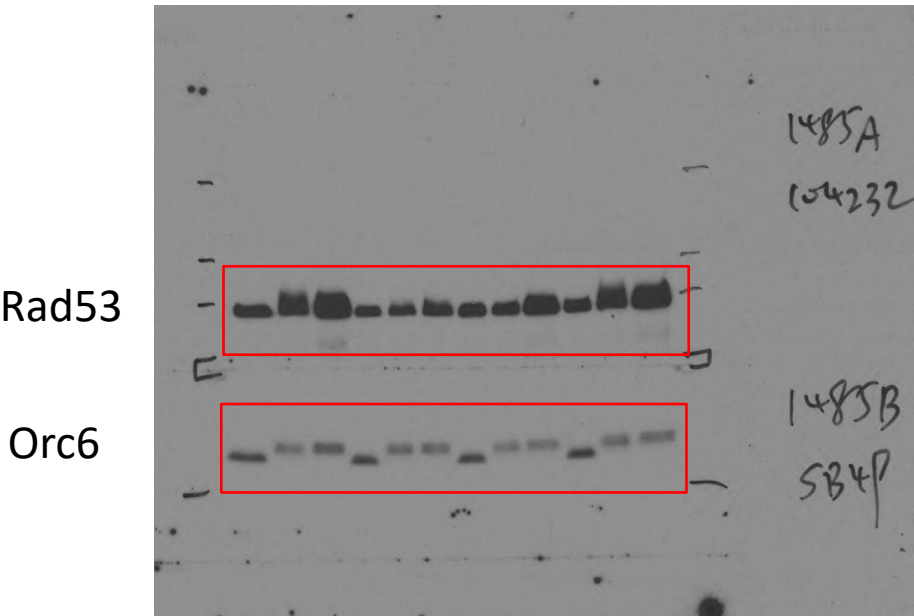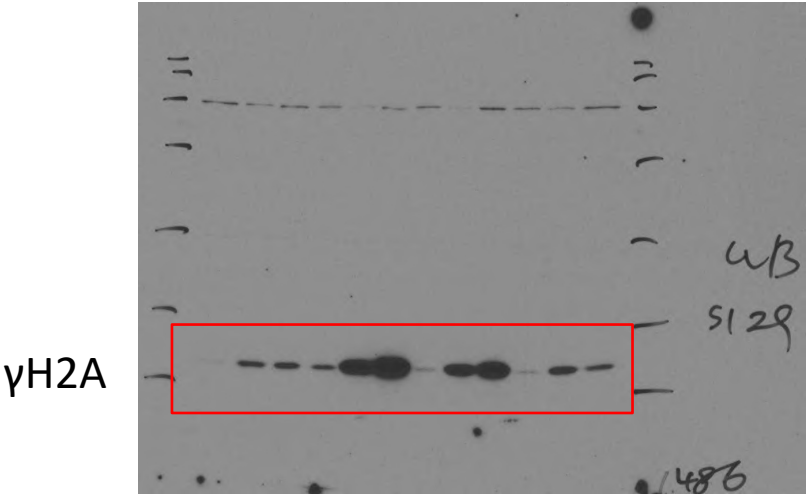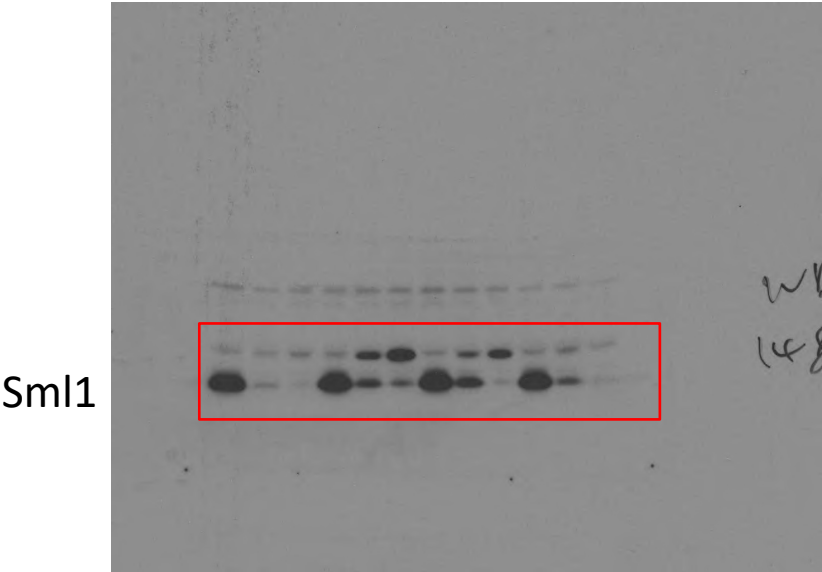

Supplement: supp [file elife-84320-supp-v1.zip]

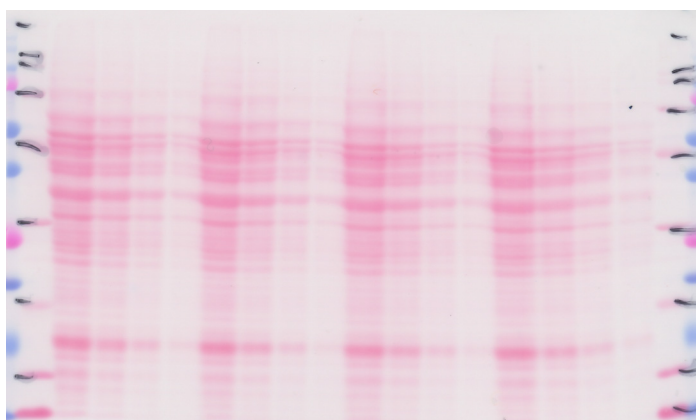

Supplement: supp [file elife-84320-supp-v1.zip]

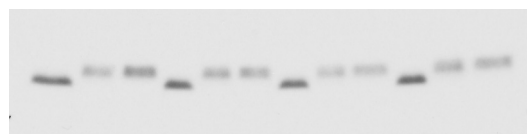

Supplement: supp [file elife-84320-supp-v1.zip]

Figure 2 – figure supplement 1

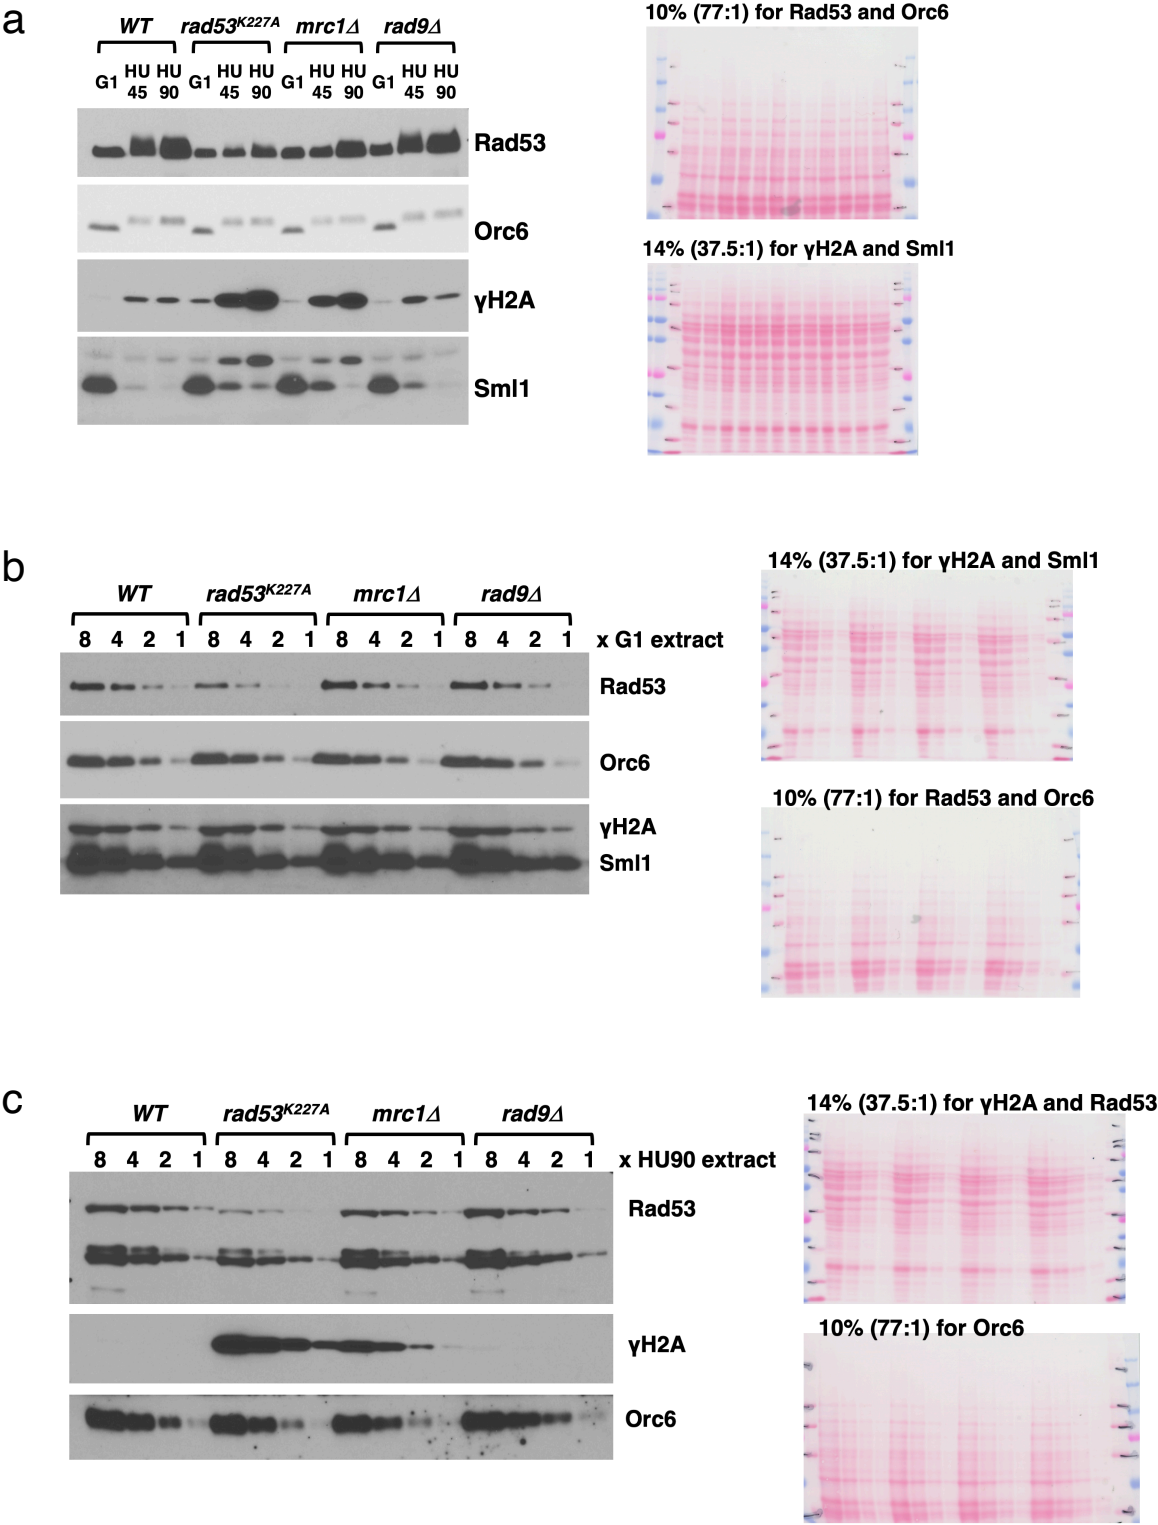

Supplement: supp [file elife-84320-supp-v1.zip]

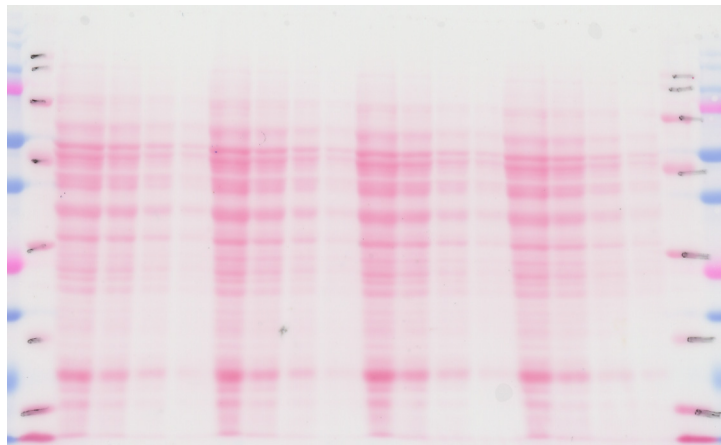

Supplement: supp [file elife-84320-supp-v1.zip]

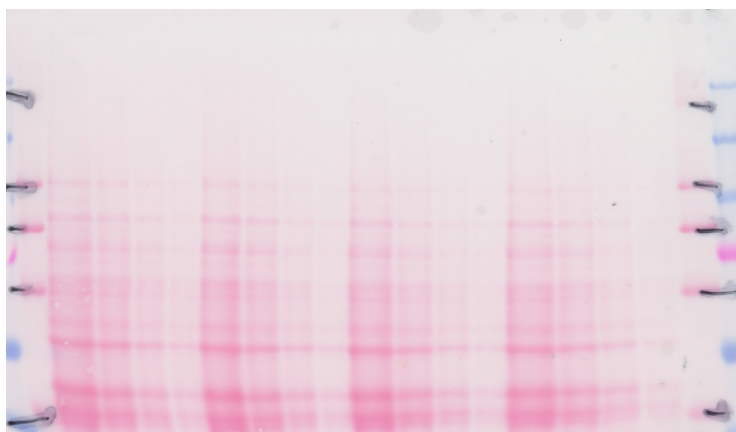

Supplement: supp [file elife-84320-supp-v1.zip]

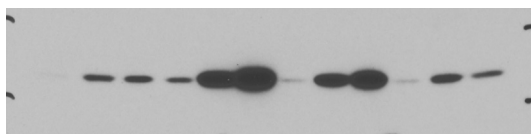

Supplement: supp [file elife-84320-supp-v1.zip]

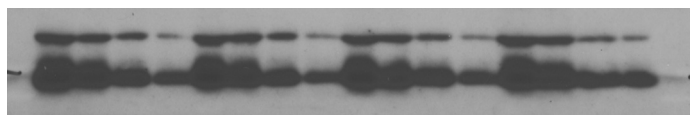

Supplement: supp [file elife-84320-supp-v1.zip]

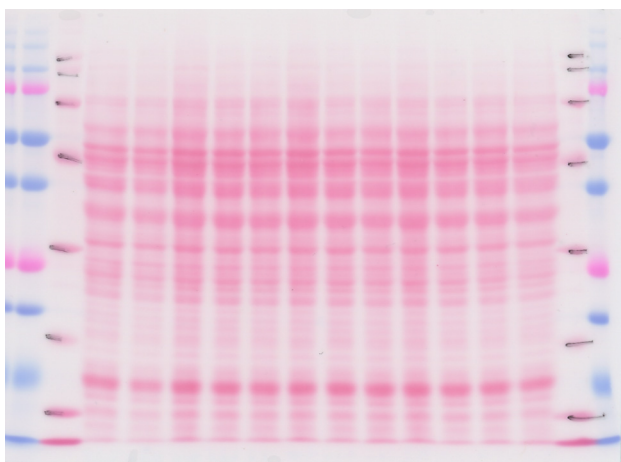

Supplement: supp [file elife-84320-supp-v1.zip]

Source Figure 2 – figure supplement 1c

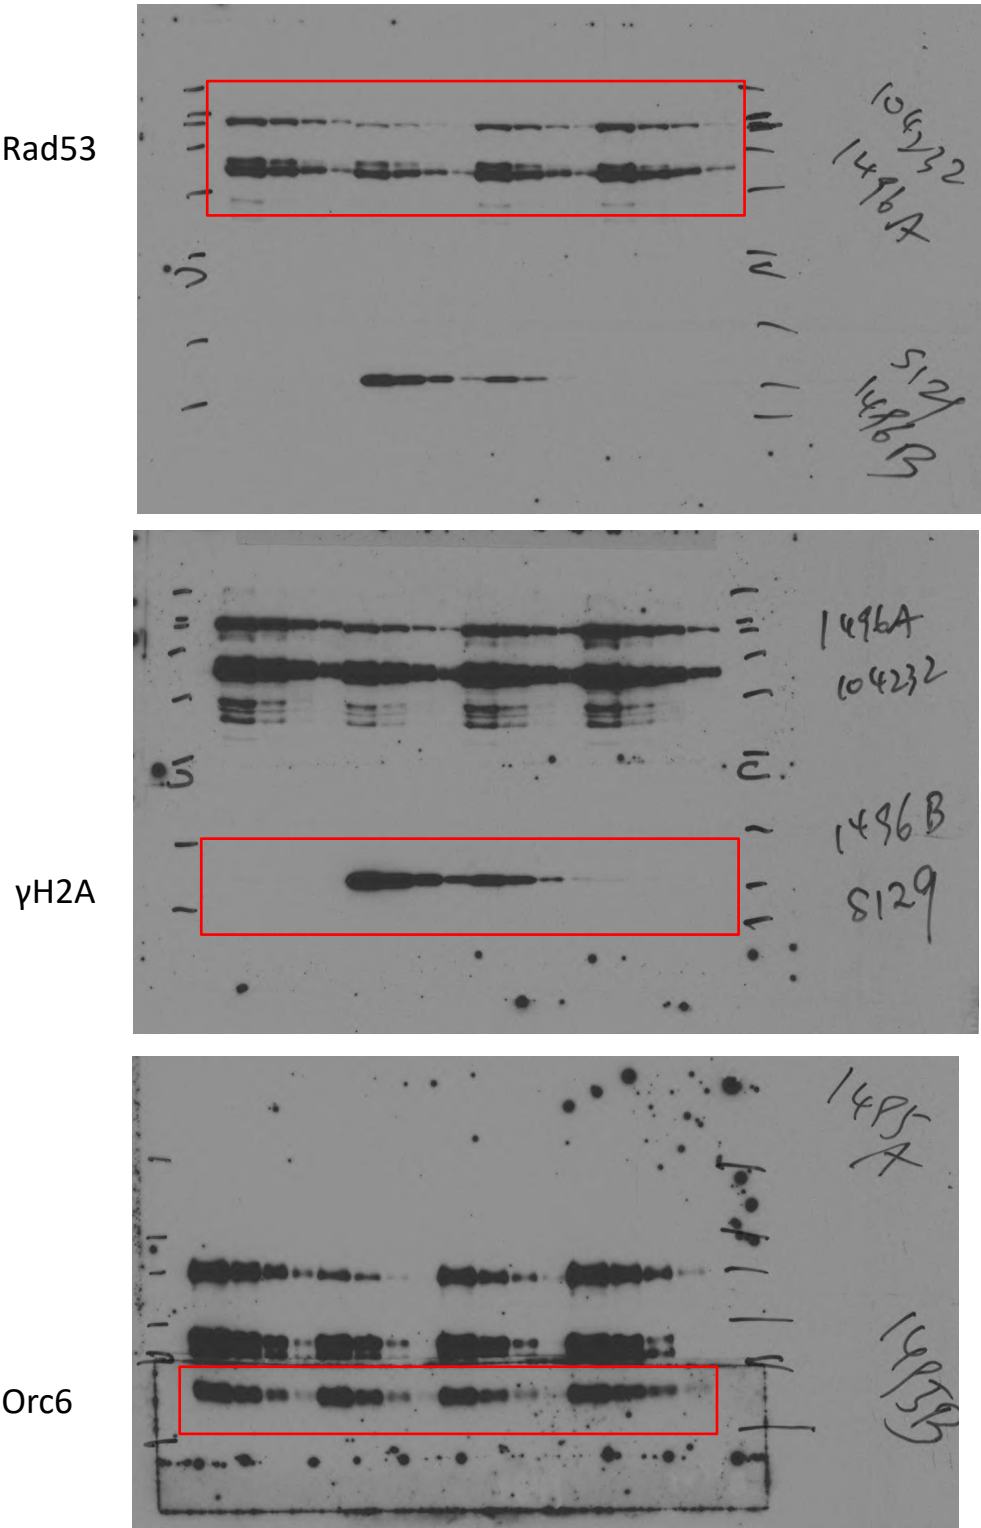

Supplement: supp [file elife-84320-supp-v1.zip]

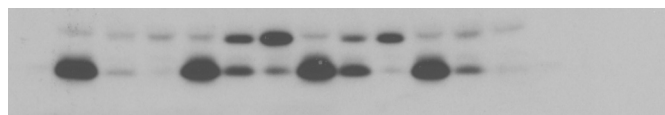

Supplement: supp [file elife-84320-supp-v1.zip]

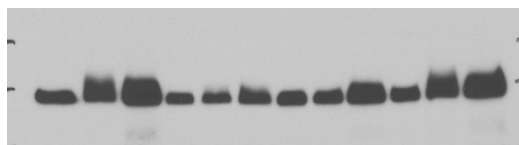

Supplement: supp [file elife-84320-supp-v1.zip]

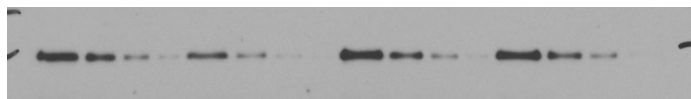

Supplement: supp [file elife-84320-supp-v1.zip]

Figure 2 – figure supplement 2

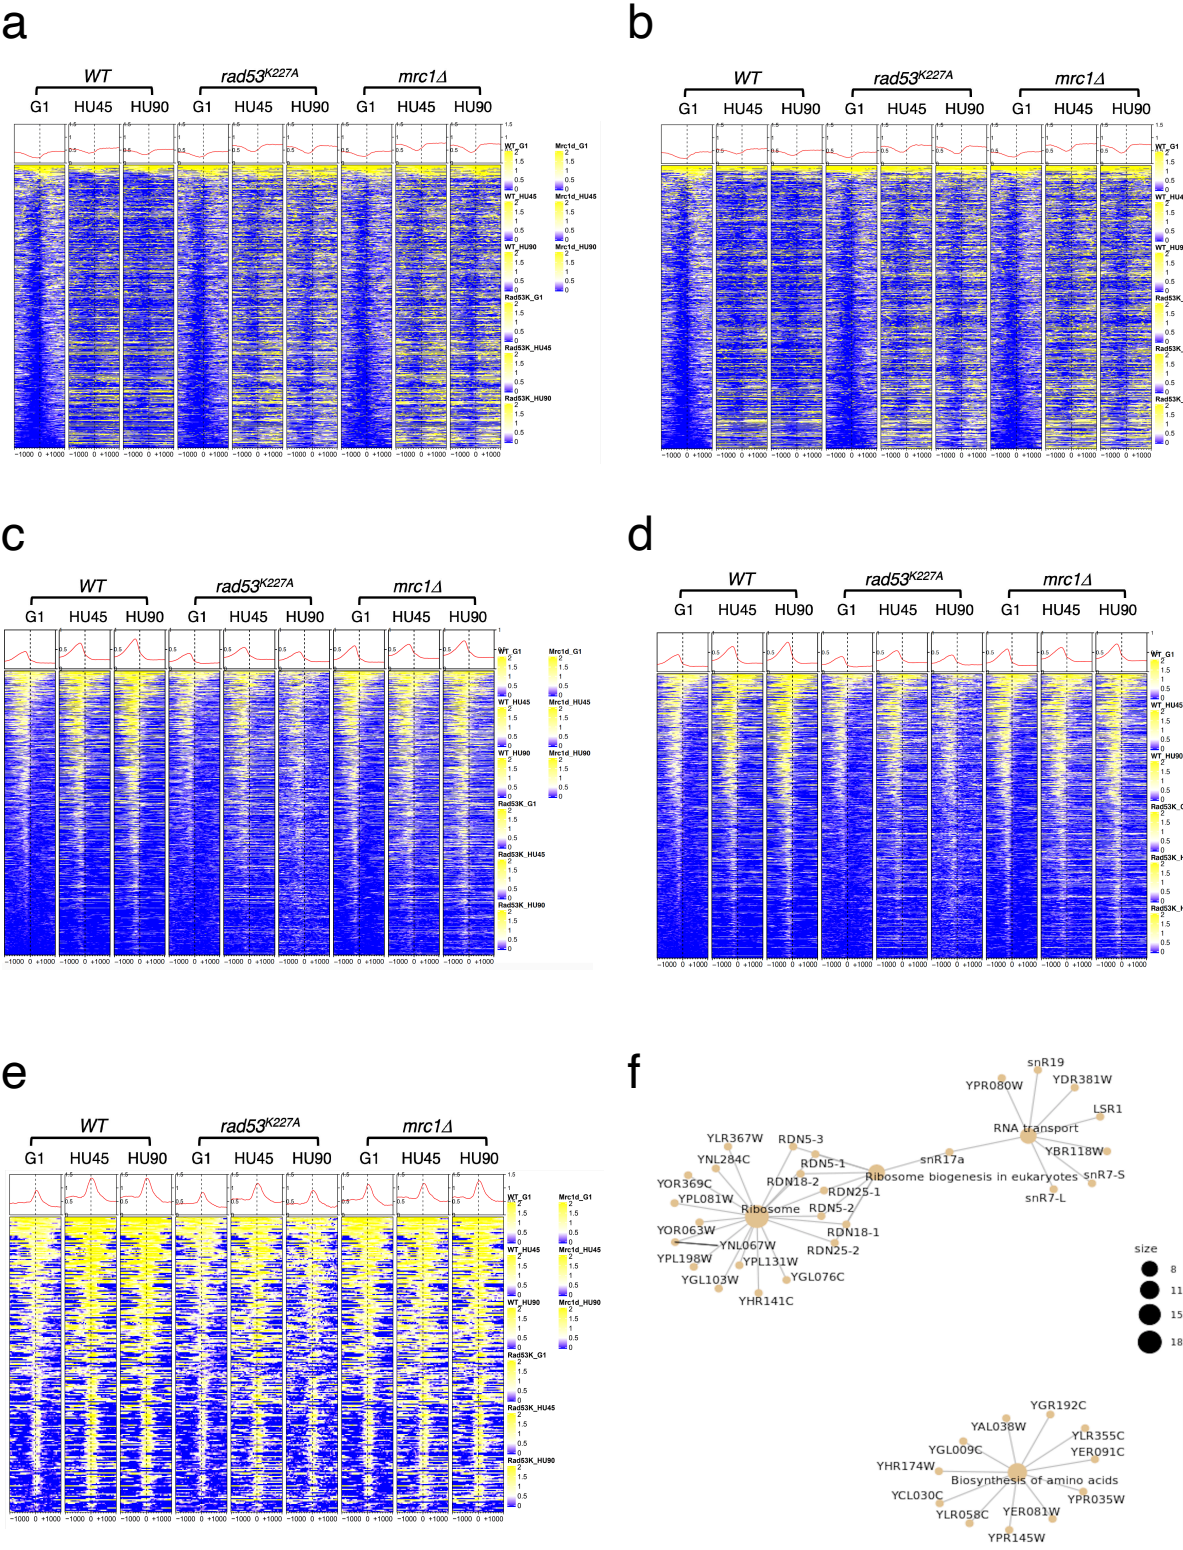

Supplement: supp [file elife-84320-supp-v1.zip]

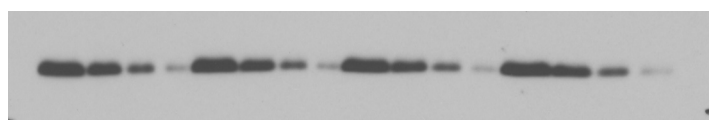

Supplement: supp [file elife-84320-supp-v1.zip]

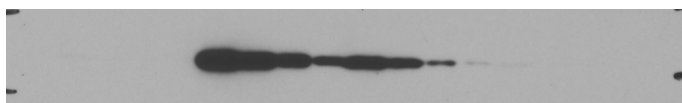

Supplement: supp [file elife-84320-supp-v1.zip]

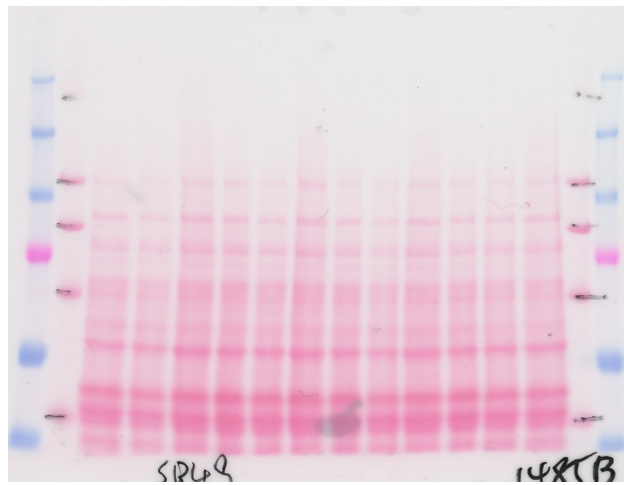

Supplement: supp [file elife-84320-supp-v1.zip]

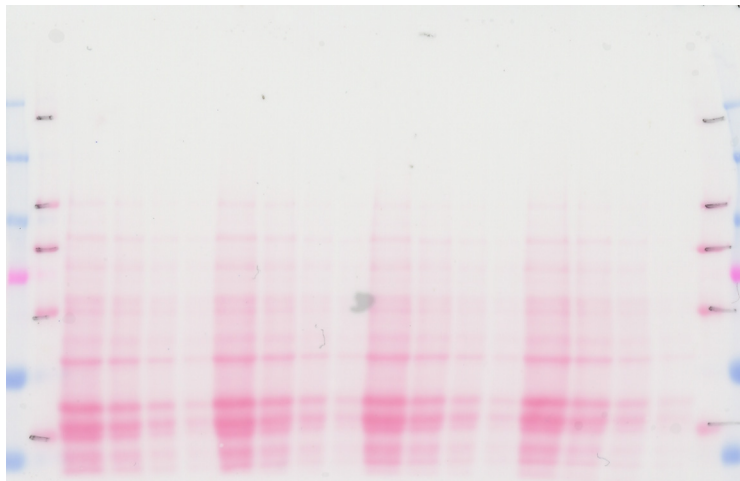

Supplement: supp [file elife-84320-supp-v1.zip]

Source Figure 2 – figure supplement 1b

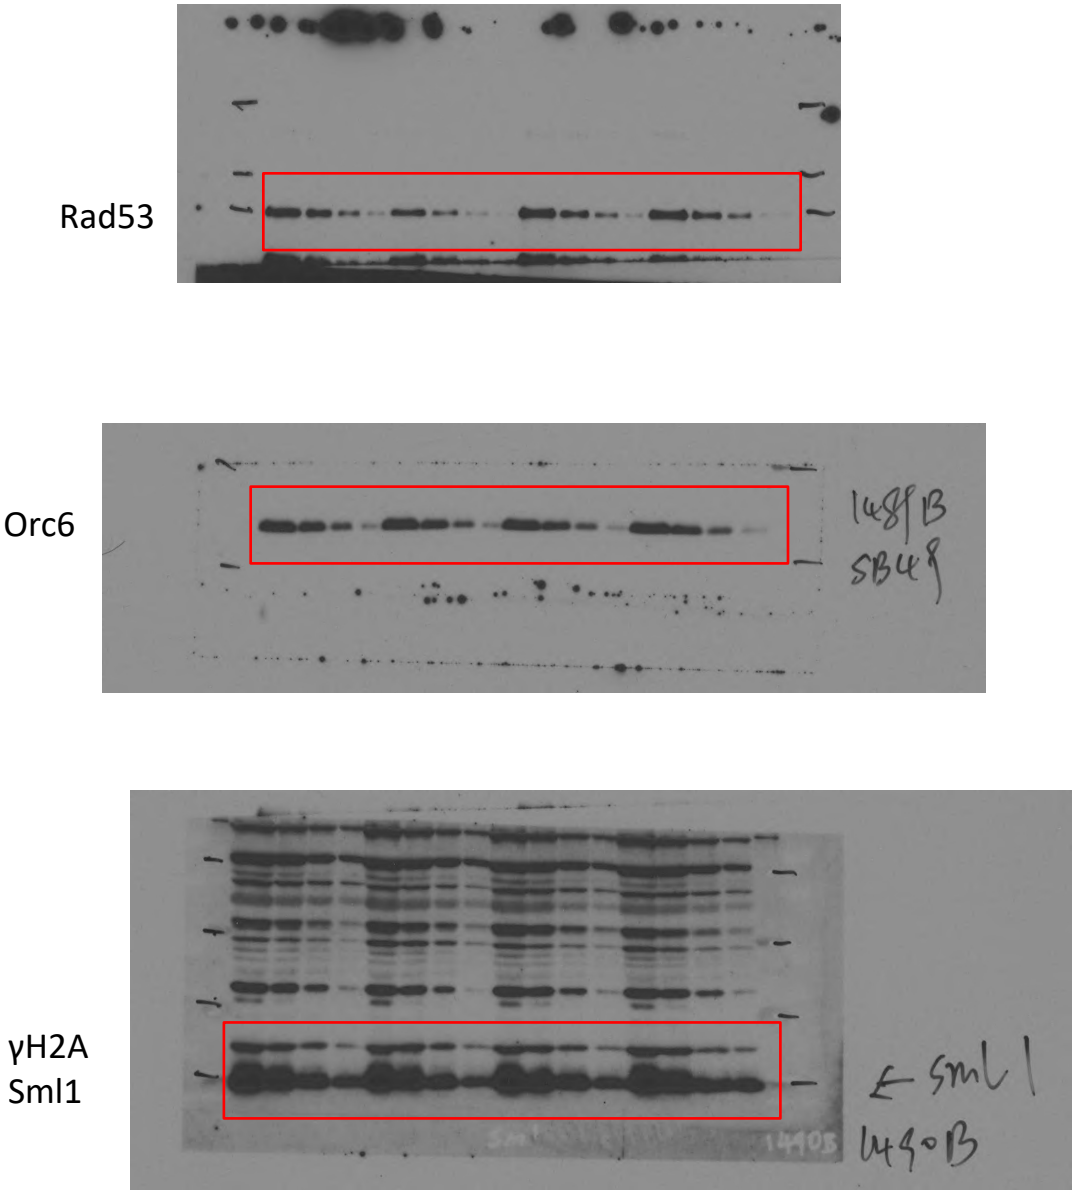

Supplement: supp [file elife-84320-supp-v1.zip]

Figure 4 – figure supplement 1

a

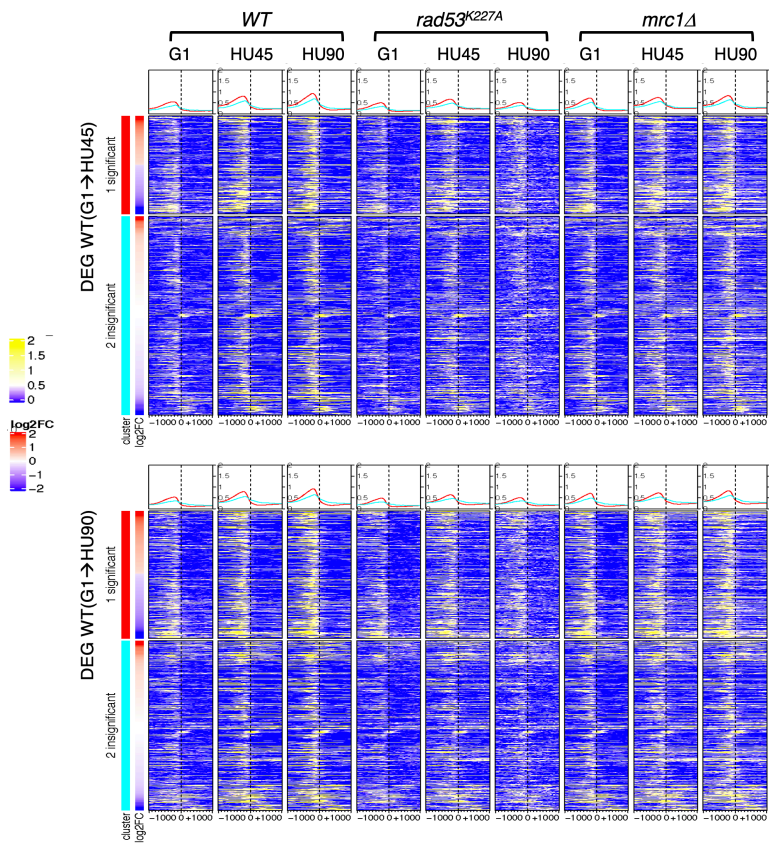

b

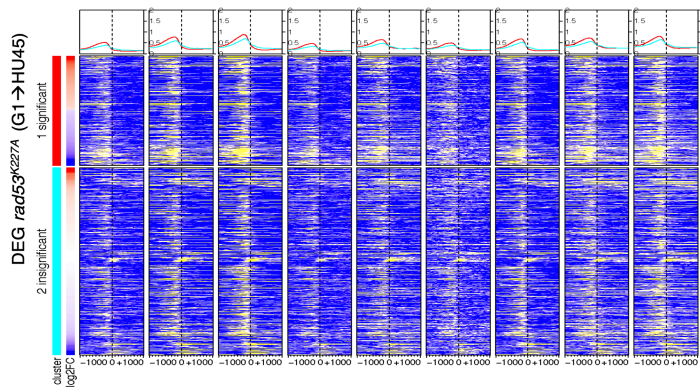

c

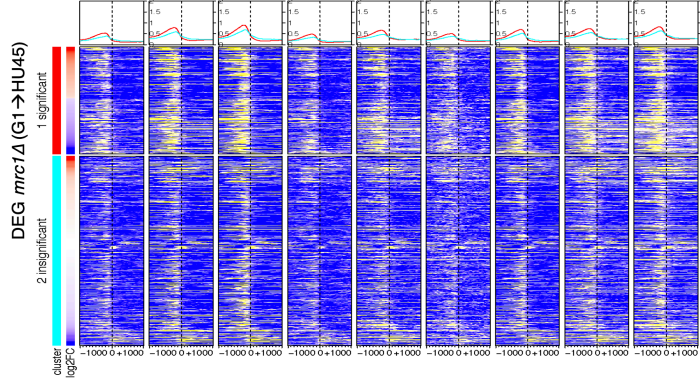

Supplement: supp [file elife-84320-supp-v1.zip]
